# Supplementary material
Source: MDPI journal article supplement (https://www.mdpi.com/2073-4433/8/5/69)
Supplement: s1 [file s1]

South Africa enteric methane emissions from 1990 to 2014 using country-specific factors for cattle and sheep and IPCC default factors for all other animals

| Year    | Animal category               |                  |        |       |        |                   |      | Total emissions |
|---------|-------------------------------|------------------|--------|-------|--------|-------------------|------|-----------------|
|         | Dairy Cows                    | Non-Dairy Cattle | Sheep  | Goats | Horses | Donkeys and Mules | Pigs |                 |
|         | (Gg CH <sub>4</sub> per year) |                  |        |       |        |                   |      |                 |
| 1990    | 76.51                         | 863.82           | 280.39 | 34.86 | 4.14   | 1.64              | 2.66 | 1264.02         |
| 1991    | 88.44                         | 874.11           | 268.96 | 33.25 | 4.14   | 1.64              | 2.84 | 1273.38         |
| 1992    | 76.51                         | 884.26           | 258.93 | 32.41 | 4.14   | 1.64              | 2.75 | 1260.64         |
| 1993    | 81.48                         | 854.77           | 243.85 | 31.78 | 4.23   | 1.64              | 2.78 | 1220.53         |
| 1994    | 76.51                         | 812.76           | 245.39 | 32.67 | 4.32   | 1.64              | 2.62 | 1175.91         |
| 1995    | 81.48                         | 806.38           | 242.25 | 32.83 | 4.41   | 1.64              | 2.57 | 1171.56         |
| 1996    | 81.48                         | 833.54           | 242.97 | 33.02 | 4.50   | 1.64              | 2.80 | 1199.94         |
| 1997    | 78.50                         | 860.56           | 238.25 | 32.96 | 4.59   | 1.64              | 2.78 | 1219.28         |
| 1998    | 78.50                         | 879.71           | 238.84 | 32.79 | 4.68   | 1.64              | 2.76 | 1238.92         |
| 1999    | 75.52                         | 890.06           | 235.36 | 30.96 | 4.64   | 1.64              | 2.78 | 1240.97         |
| 2000    | 98.38                         | 870.78           | 226.76 | 31.73 | 4.86   | 1.64              | 2.72 | 1236.87         |
| 2001    | 98.38                         | 856.46           | 223.97 | 32.75 | 4.86   | 1.64              | 2.61 | 1220.66         |
| 2002    | 84.46                         | 869.55           | 216.89 | 33.00 | 4.86   | 1.64              | 2.72 | 1213.12         |
| 2003    | 78.50                         | 881.14           | 216.89 | 31.98 | 4.86   | 1.64              | 2.70 | 1217.71         |
| 2004    | 76.51                         | 877.23           | 215.02 | 31.94 | 4.86   | 1.64              | 2.73 | 1209.93         |
| 2005    | 81.48                         | 876.38           | 214.45 | 31.93 | 4.86   | 1.64              | 2.73 | 1213.47         |
| 2006    | 79.50                         | 882.31           | 211.63 | 32.04 | 5.04   | 1.64              | 2.76 | 1214.91         |
| 2007    | 78.50                         | 910.44           | 212.26 | 31.33 | 5.22   | 1.65              | 2.90 | 1242.30         |
| 2008    | 97.38                         | 892.14           | 212.04 | 32.65 | 5.36   | 1.65              | 2.83 | 1244.06         |
| 2009    | 99.37                         | 886.09           | 211.91 | 31.79 | 5.40   | 1.65              | 2.80 | 1239.00         |
| 2010    | 99.37                         | 881.66           | 207.77 | 31.37 | 5.40   | 1.66              | 2.83 | 1230.06         |
| 2011    | 96.39                         | 883.16           | 206.09 | 30.83 | 5.49   | 1.67              | 2.88 | 1226.50         |
| 2012    | 92.41                         | 898.79           | 206.84 | 30.71 | 5.54   | 1.67              | 2.90 | 1238.86         |
| 2013    | 98.38                         | 896.51           | 208.00 | 30.14 | 5.58   | 1.71              | 2.94 | 1243.24         |
| 2014    | 94.40                         | 904.13           | 204.56 | 29.86 | 5.62   | 1.74              | 2.98 | 1243.27         |
| Mean    | 85.94                         | 873.07           | 227.61 | 32.06 | 4.86   | 1.65              | 2.77 | 1227.96         |
| StdDev* | 9.11                          | 25.36            | 20.98  | 1.09  | 0.49   | 0.02              | 0.10 | 24.04           |

\*StdDev: Standard Deviation
